# Supplementary material for: Rituximab in combination with cyclophosphamide, doxorubicin, vincristine, and prednisone (R-CHOP) in diffuse large B-cell lymphoma
Source: PubMed Central journal article supplement — Ther Adv Hematol. 2021 Jan 30;12:2040620721989579. doi: 10.1177/2040620721989579 (PMC7970687; doi:10.1177/2040620721989579), 2021-01-30
Supplement: sj-pdf-1-tah-10.1177_2040620721989579.pdf [file sj-pdf-1-tah-10.1177_2040620721989579.pdf]

**Supplementary table 1. Phase III clinical trials comparing R-CHOP vs R-CHOP plus a targeted drug.**

| <b>Clinical trials. Identifier</b> | <b>Clinical trial.</b>                                                                                                                                                                                                                                                                  | <b>Status</b>         |
|------------------------------------|-----------------------------------------------------------------------------------------------------------------------------------------------------------------------------------------------------------------------------------------------------------------------------------------|-----------------------|
| NCT03777085                        | A Study to Compare the Efficacy and Safety of JHL 1101 Versus Rituximab in Patients with Previously Untreated Diffuse Large B-Cell Lymphoma (DLBCL)                                                                                                                                     | Completed, no results |
| NCT01659099                        | GA In Newly Diagnosed Diffuse Large B Cell Lymphoma (GAINED)                                                                                                                                                                                                                            | Completed, no results |
| NCT04231448                        | Phase III Study of Tocidinostat in Combination with R-CHOP in Patients with Newly Diagnosed Double-Expressor DLBCL.                                                                                                                                                                     | Recruiting            |
| NCT03263026                        | Study to Assess Enzastaurin + RCHOP in Subjects with DLBCL With the Genomic Biomarker DGM1™                                                                                                                                                                                             | Recruiting            |
| NCT03274492                        | A Study Comparing the Efficacy and Safety of Polatuzumab Vedotin With Rituximab-Cyclophosphamide, Doxorubicin, and Prednisone (R-CHP) Versus Rituximab-Cyclophosphamide, Doxorubicin, Vincristine, and Prednisone (RCHOP) in Participants with Diffuse Large B-Cell Lymphoma (POLARIX). | Recruiting            |
| NCT02871869                        | Cinobufacini Tablets Combined With Chemotherapeutic Protocol in Treatment of Diffuse Large B Cell Lymphoma.                                                                                                                                                                             | Recruiting            |
| NCT03984448                        | Testing the Addition of a New Anti-cancer Drug, Venetoclax to Usual Chemotherapy for High Grade B-Cell Lymphomas.                                                                                                                                                                       | Recruiting            |
| NCT04529772                        | A Combination of Acalabrutinib with R-CHOP in Subjects With Previously Untreated Non-GCB Subtype DLBCL (ACE-LY-312).                                                                                                                                                                    | Not yet recruiting    |
